# Supplementary material
Source: PubMed Central journal article supplement (PMC4868355)

**Figure S1. Participant flow through the study.** Following screening, eligible participants went through a 2 week washout period where all phosphate binders were discontinued. Participants with serum phosphorus higher than 6 mg/dL were then randomized to ferric citrate or active control. The active control period lasted 52 weeks. Participants that took ferric citrate for 52 weeks were then randomized to continue ferric citrate or to start placebo during a 4 week efficacy period. This study focuses on the results of the 52 week active control period.

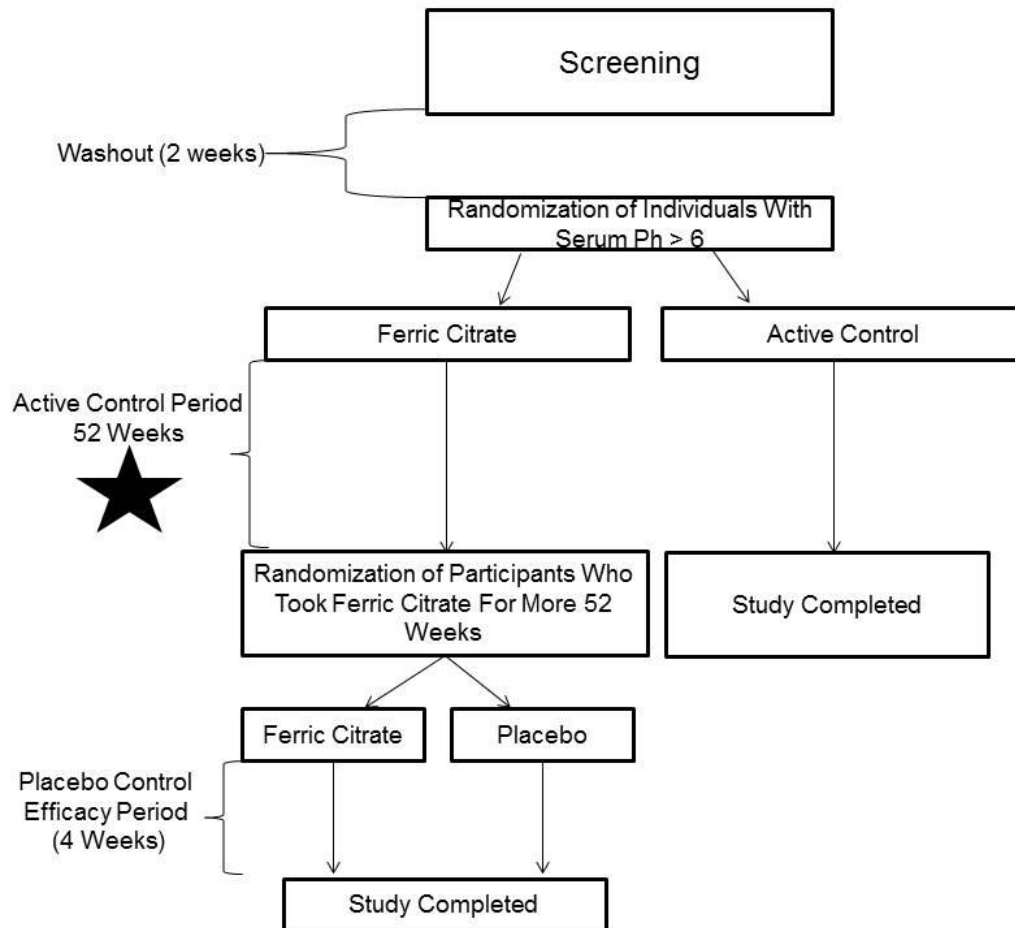

Supplement: NIHMS776947-supplement-Supplementary_Figure.pdf [file NIHMS776947-supplement-Supplementary_Figure.pdf]
