# Supplementary material
Source: PubMed Central journal article supplement (PMC4868355)
Supplement: NIHMS776947-supplement-Supplementary_Table_1.pdf [file NIHMS776947-supplement-Supplementary_Table_1.pdf]

**Table S1: Baseline and Follow Values for Phosphorus, Calcium, and Parathyroid Hormone For Ferric Citrate, Active Control, and Individual Subgroups of Active Control**

|                                            | Baseline<br>Mean (Std) <sup>1</sup> |                  |                  |                  |                  | Week 52<br>Mean (Std) <sup>1</sup> |                  |                  |                  |                  |
|--------------------------------------------|-------------------------------------|------------------|------------------|------------------|------------------|------------------------------------|------------------|------------------|------------------|------------------|
|                                            | FC                                  | AC               | SC               | CA               | SC+CA            | FC                                 | AC               | SC               | CA               | SC+CA            |
| <b>Phosphorus<br/>(mg/dL)</b>              | n=281,189                           | n=146,113        | n=78,63          | n=39,28          | n=29,22          | n=281,189                          | n=146,113        | n=78,63          | n=39,28          | n=29,22          |
|                                            | 7.39<br>(1.62)                      | 7.54<br>(1.74)   | 7.46<br>(1.63)   | 7.35<br>(1.70)   | 7.99<br>(2.07)   | 5.36<br>(1.61)                     | 5.38<br>(1.58)   | 5.36<br>(1.65)   | 5.32<br>(1.43)   | 5.53<br>(1.63)   |
| <b>Calcium<br/>(mg/dL)</b>                 | n=281,189                           | n=146,113        | n=78,63          | n=39,28          | n=29,22          | n=281,189                          | n=146,113        | n=78,63          | n=39,28          | n=29,22          |
|                                            | 8.91<br>(0.78)                      | 8.95<br>(0.85)   | 9.13<br>(0.70)   | 8.84<br>(0.83)   | 8.64<br>(1.11)   | 9.12<br>(0.86)                     | 9.27<br>(0.92)   | 9.30<br>(0.81)   | 9.35<br>(1.06)   | 9.06<br>(1.01)   |
| <b>Parathyroid<br/>Hormone<br/>(pg/dL)</b> | n=247,189                           | n=133,108        | n=72,62          | n=35,26          | n=26,20          | n=247,189                          | n=133,108        | n=72,62          | n=35,26          | n=26,20          |
|                                            | 606.0<br>(404.7)                    | 602.0<br>(539.8) | 627.1<br>(425.9) | 418.9<br>(261.7) | 783.7<br>(907.1) | 453.4<br>(369.1)                   | 431.5<br>(335.3) | 504.7<br>(368.8) | 299.9<br>(219.6) | 406.3<br>(318.4) |

FC, Ferric Citrate; AC, Active Control; SC, Sevelamer Carbonate; CA, Calcium Acetate; SC + CA, Combination of Sevelamer Carbonate and Calcium Acetate

<sup>1</sup>Analyses performed using last value carried forward imputation for missing measurements. Sample sizes indicate the number of patients with nonmissing baseline and follow-up data after the last value carried forward imputation, followed by the sample size for patients with nonmissing baseline and 12-month follow-up measurements.
