# Supplementary material
Source: PubMed Central journal article supplement (PMC4868355)
Supplement: NIHMS776947-supplement-Supplementary_Table_2.pdf [file NIHMS776947-supplement-Supplementary_Table_2.pdf]

**Table S2: Baseline and Follow Up Values For Variables Related To Protein Energy Wasting/Inflammation for Participants in FC, AC, and individual subgroups of AC**

|                                    | Baseline<br>Mean (Std) |                   |                   |                   |                   | Week 52<br>Mean (Std) |                   |                   |                   |                   |
|------------------------------------|------------------------|-------------------|-------------------|-------------------|-------------------|-----------------------|-------------------|-------------------|-------------------|-------------------|
|                                    | FC                     | AC                | SC                | CA                | SC+CA             | FC                    | AC                | SC                | CA                | SC+CA             |
| <b>Serum Albumin (g/dL)</b>        | n=245,183              | n=126,105         | n=68,58           | n=35,27           | n=23,20           | n=245,183             | n=126,105         | n=68,58           | n=35,27           | n=23,20           |
|                                    | 4.01<br>(0.34)         | 4.00<br>(0.33)    | 4.00<br>(0.29)    | 3.99<br>(0.38)    | 4.00<br>(0.37)    | 3.97<br>(0.42)        | 3.97<br>(0.35)    | 3.97<br>(0.28)    | 4.04<br>(0.40)    | 3.87<br>(0.43)    |
| <b>Serum Bicarbonate (mmol/L)</b>  | n=220,162              | n=121,94          | n=66,51           | n=33,23           | n=22,20           | n=220,162             | n=121,94          | n=66,51           | n=33,23           | n=22,20           |
|                                    | 23.91<br>(3.41)        | 23.56<br>(3.52)   | 23.72<br>(3.20)   | 23.58<br>(3.31)   | 23.06<br>(4.72)   | 24.78<br>(3.48)       | 25.24<br>(3.84)   | 25.33<br>(3.93)   | 24.70<br>(3.43)   | 25.78<br>(4.19)   |
| <b>Blood Urea Nitrogen (mg/dL)</b> | n=243,182              | n=126,105         | n=68,58           | n=35,27           | n=23,20           | n=243,182             | n=126,105         | n=68,58           | n=35,27           | n=23,20           |
|                                    | 55.45<br>(14.55)       | 57.49<br>(15.72)  | 56.01<br>(14.96)  | 57.34<br>(14.46)  | 62.09<br>(19.26)  | 51.42<br>(14.39)      | 52.96<br>(15.11)  | 50.68<br>(14.62)  | 56.60<br>(12.69)  | 54.17<br>(18.95)  |
| <b>Serum Creatinine (mg/dL)</b>    | n=244,183              | n=126,105         | n=68,58           | n=35,27           | n=23,20           | n=244,183             | n=126,105         | n=68,58           | n=35,27           | n=23,20           |
|                                    | 9.91<br>(2.68)         | 10.04<br>(2.70)   | 9.73<br>(2.49)    | 10.42<br>(2.89)   | 10.38<br>(2.98)   | 10.04<br>(2.81)       | 9.98<br>(2.86)    | 9.70<br>(2.92)    | 10.57<br>(3.02)   | 9.93<br>(2.37)    |
| <b>WBC Count (x10<sup>3</sup>)</b> | n=248,188              | n=132,111         | n=72,62           | n=35,27           | n=25,22           | n=248,188             | n=132,111         | n=72,62           | n=35,27           | n=25,22           |
|                                    | 6.65<br>(1.97)         | 6.49<br>(2.19)    | 6.59<br>(2.19)    | 6.30<br>(2.16)    | 6.46<br>(2.34)    | 6.57<br>(2.02)        | 6.48<br>(1.97)    | 6.48<br>(1.69)    | 6.41<br>(2.42)    | 6.55<br>(2.10)    |
| <b>WBC, % Lymphocytes</b>          | n=248,188              | n=132,110         | n=72,62           | n=35,27           | n=25,21           | n=248,188             | n=132,110         | n=72,62           | n=35,27           | n=25,21           |
|                                    | 22.33<br>(7.70)        | 22.35<br>(8.62)   | 22.21<br>(8.61)   | 22.83<br>(7.86)   | 22.06<br>(9.88)   | 22.09<br>(7.90)       | 21.73<br>(8.23)   | 21.09<br>(7.58)   | 23.07<br>(9.38)   | 21.68<br>(8.44)   |
| <b>Total Cholesterol (mg/dL)</b>   | n=243,182              | n=126,103         | n=68,57           | n=35,26           | n=23,20           | n=243,182             | n=126,103         | n=68,57           | n=35,26           | n=23,20           |
|                                    | 157.24<br>(39.81)      | 151.92<br>(36.45) | 149.90<br>(35.26) | 151.83<br>(38.21) | 158.04<br>(38.14) | 156.42<br>(41.56)     | 136.17<br>(32.21) | 130.12<br>(30.62) | 148.20<br>(33.66) | 135.74<br>(30.72) |
| <b>LDL Cholesterol (mg/dL)</b>     | n=243,182              | n=125,101         | n=67,56           | n=35,26           | n=23,19           | n=243,182             | n=125,101         | n=67,56           | n=35,26           | n=23,19           |
|                                    | 85.63<br>(31.80)       | 82.79<br>(26.66)  | 82.88<br>(26.95)  | 82.34<br>(28.33)  | 83.22<br>(24.23)  | 82.44<br>(30.84)      | 67.69<br>(23.18)  | 62.64<br>(18.55)  | 77.14<br>(26.92)  | 68.00<br>(25.63)  |

FC, Ferric Citrate; AC, Active Control; SC, Sevelamer Carbonate; CA, Calcium Acetate; SC + CA, Combination of Sevelamer Carbonate and Calcium Acetate  
Sample sizes indicate the number of patients with nonmissing baseline and follow-up data, followed by the sample size for patients with nonmissing baseline and 12-month follow-up measurements.
